# Supplementary material for: ProtSeq: Toward high-throughput, single-molecule protein sequencing via amino acid conversion into DNA barcodes
Source: PubMed Central journal article supplement — iScience. 2021 Dec 11;25(1):103586. doi: 10.1016/j.isci.2021.103586 (PMC8717419; doi:10.1016/j.isci.2021.103586), 2021-12-11
Supplement: mmc1.pdf [file mmc1.pdf]

## **Supplemental information**

### **ProtSeq: Toward high-throughput, single-molecule protein sequencing via amino acid conversion into DNA barcodes**

**Jessica M. Hong, Michael Gibbons, Ali Bashir, Diana Wu, Shirley Shao, Zachary Cutts, Mariya Chavarha, Ye Chen, Lauren Schiff, Mikelle Foster, Victoria A. Church, Llyke Ching, Sara Ahadi, Anna Hieu-Thao Le, Alexander Tran, Michelle Dimon, Marc Coram, Brian Williams, Phillip Jess, Marc Berndl, and Annalisa Pawlosky**

# Supplemental Figures

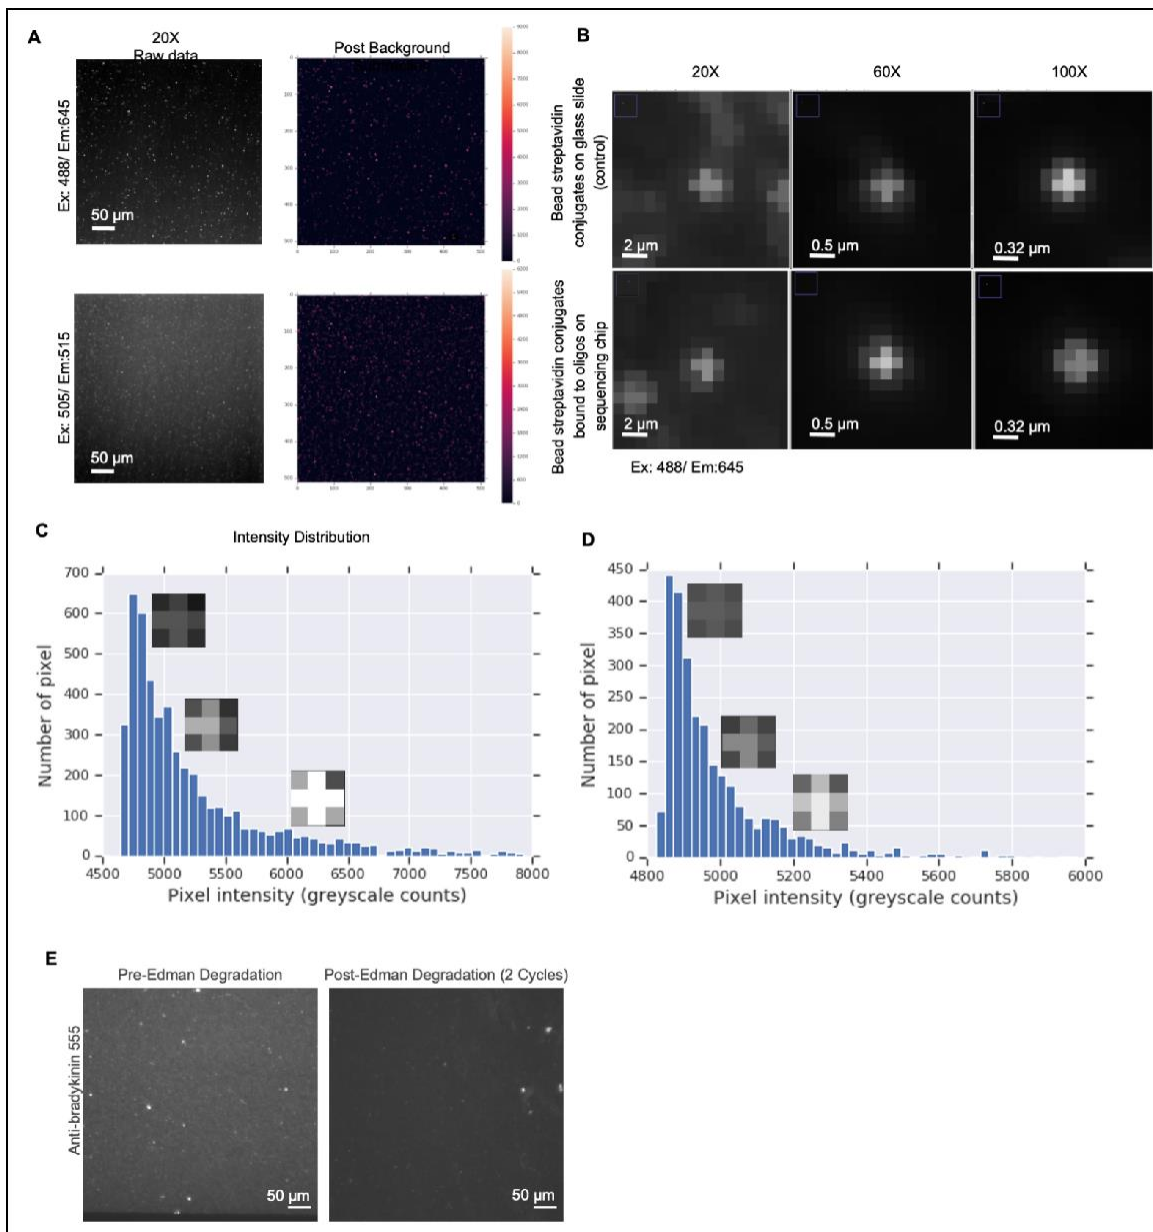

**Figure S1 Single Molecule Imaging Quality Control and Edman Degradation, Related to Figure 1**

- (A) Fluorescent images of fluorescent bead-streptavidin conjugates on a sequencing chip and the intensity measurement after background subtraction using a local threshold. The threshold value is the median intensity for the local neighborhood (30 by 30 pixel) of pixels.
- (B) Images of fluorescent bead-streptavidin conjugates on a glass slide (single molecule control) and bound to single oligos on a sequencing chip at 20x, 60x, and 100x magnification. The similarity of sizes of the observed spots between the fluorescent beads on the chip and sequencing chip suggests the observed spots on the sequencing chip are single molecules.
- (C) Threshold intensity distributions for all of the fluorescent spots in S1A 488 excitation channel.
- (D) Threshold intensity distributions for all of the fluorescent spots in S1A 505 excitation channel.
- (E) Depicts fluorescent images of a flow cell with bradykinin attached to its surface prior to Edman degradation and after 2 cycles of Edman degradation. Flow cells were probed with fluorescent bradykinin antibody and imaged through the 555 channel. Diminishing but not absent signal indicates decreased antibody binding, which may suggest peptides are partially degraded while still remaining

attached to the flow cell surface.



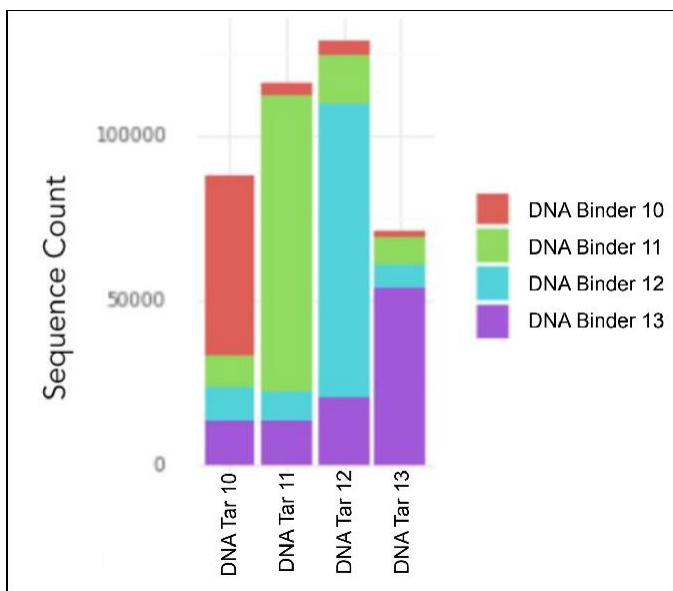

**Figure S3 BCS Performance: Binder Consistency for DNA 6 Cycle Analysis, Related to Figure 5**  
DNA-DNA Binder consistency across cycles of a 6 cycle BCS experiment for 4 summed replicates. In each case the dominant binder is to the expected DNA barcode.

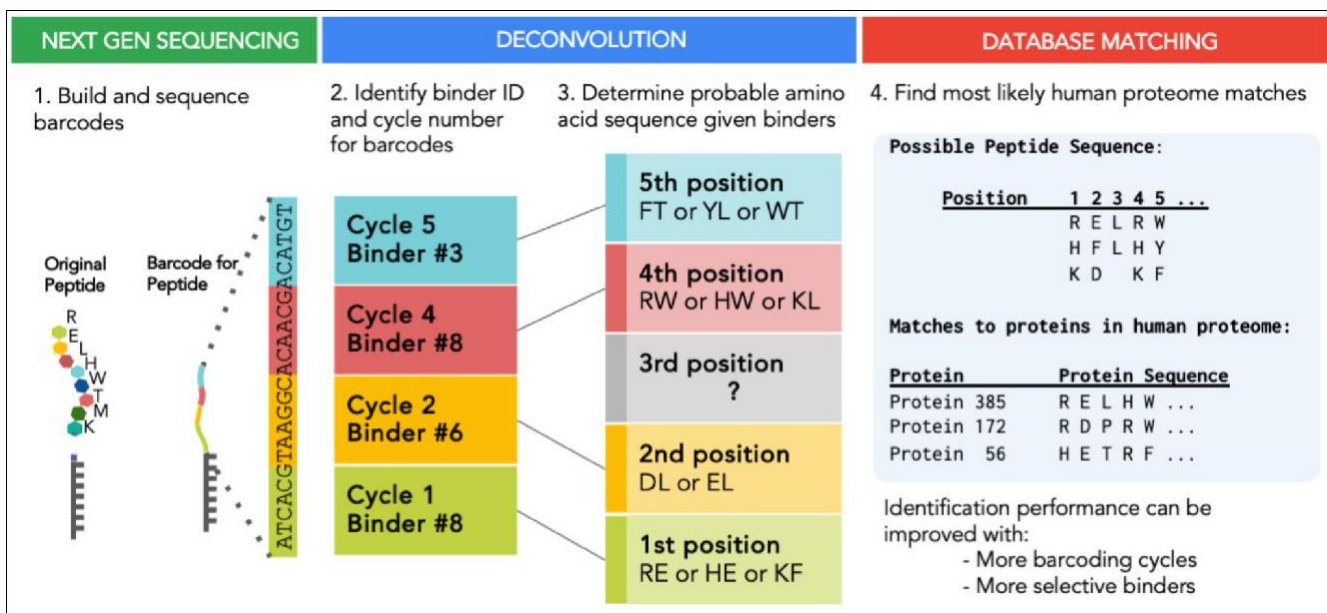

**Figure S4 ProtSeq From a Computational Perspective, Related to Graphical Abstract**

This schematic depicts the putative workflow for determining the identity of a protein from binder barcodes.

**Next-generation sequencing:** After all binding cycles are completed, the DNA barcodes assembled are sequenced with next generation sequencing.

**Deconvolution:** The binder barcodes and corresponding cycle numbers are extracted from the DNA sequence. In this example, cycle 3 had no binder leave a barcode.

**Database matching:** Given the binder barcode for each cycle number, the binder profiles (experimentally determined in advance) would be used to look up the probable amino acids at each position in the peptide fragment. In this example the profile for binder #8 would indicate that the amino acid is most likely R, H or K. With possible residues for each position, the fragment database (computed in advance) can be queried for the most probable protein matches given the probable amino acids at each position in the peptide fragment.

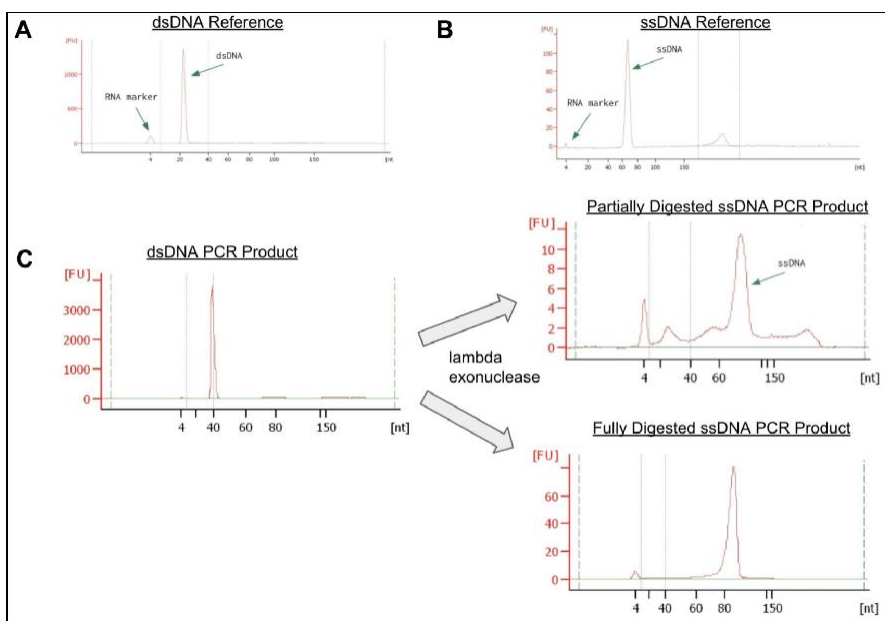

**Figure S5 Digestion Quality Control Assay, Related to Figure 8**

Bioanalyzer traces for (A) dsDNA, (B) ssDNA, (C) dsDNA PCR product, and ssDNA PCR product after partial and complete digestion with lambda exonuclease. Bioanalyzer traces are used to quality check aptamer input before each SELEX cycle.

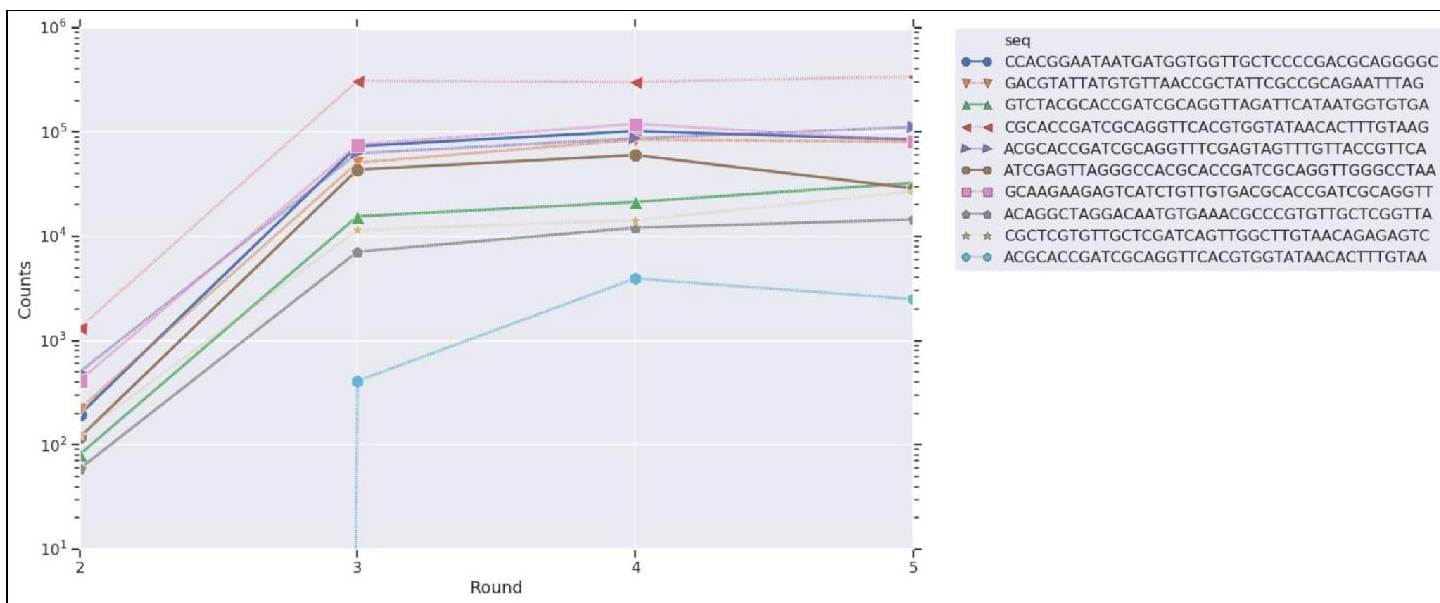

**Figure S6 Enrichment Profile from Target-Switch SELEX, Related to Figure 8**

Enrichment profile reports the sequencing counts of the top 10 most enriched sequences per round for target PPCD. X axis is the round of SELEX, Y axis is the number of counts seen during sequencing for the 10 sequences. The 10 sequences displayed were chosen because of their calculated enrichment values.

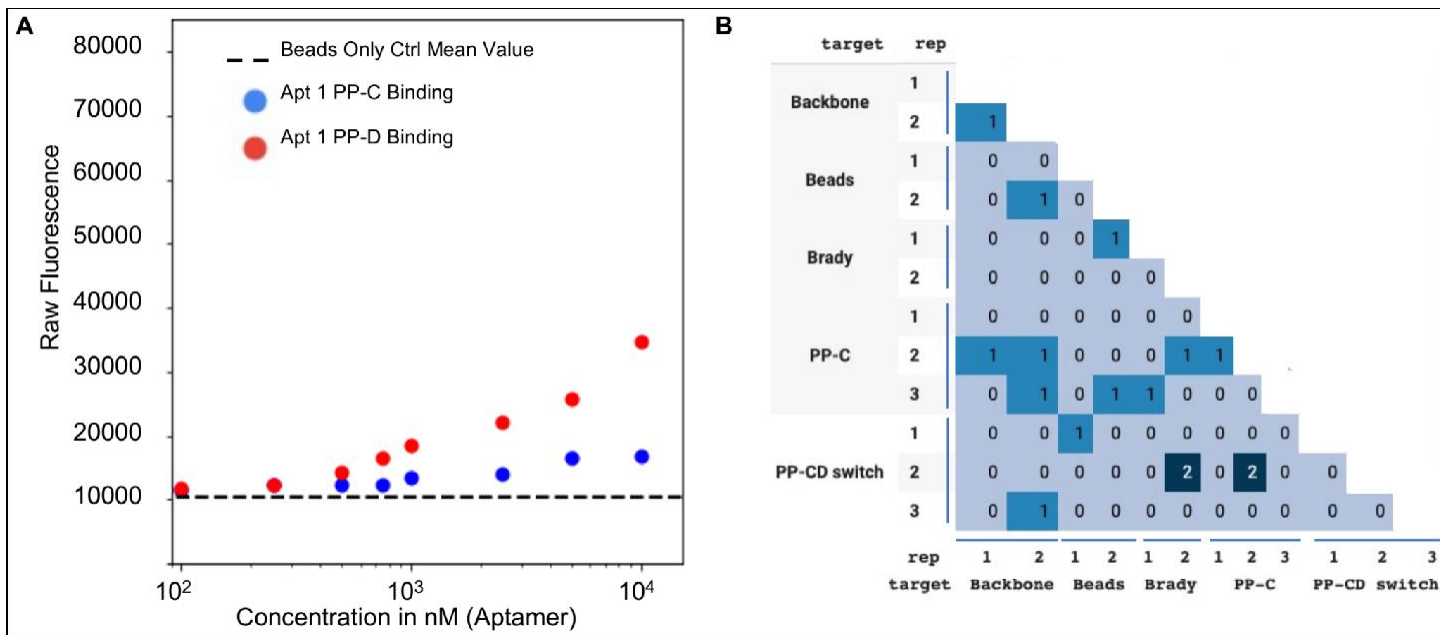

**Figure S7 Contamination analysis from Target-Switch SELEX, Related to Figure 8**

(A) Binding curves for Apt 1. Apt 1 shows increasing signal against PP-D, much greater than against PP-C. It looks to saturate against PP-C, while not saturating against PP-D, indicative of non-specific binding and influence of backbone switches.

(B) Our experimental design inclusion of replicates allows us to uniquely understand the effect of cross contamination during our selection process. When we compare top aptamers for targets and replicates (Figure 9) we can see that several sequences are observed across multiple samples. This is unlikely considering the size of the initial pool and thus suggests that there is some level of cross contamination between samples. We can observe this and account for it in our analysis when selecting aptamers that bind our target specifically versus targets that are enriched via the selection process via alternative means (generally sticky, selectively amplified during PCR).

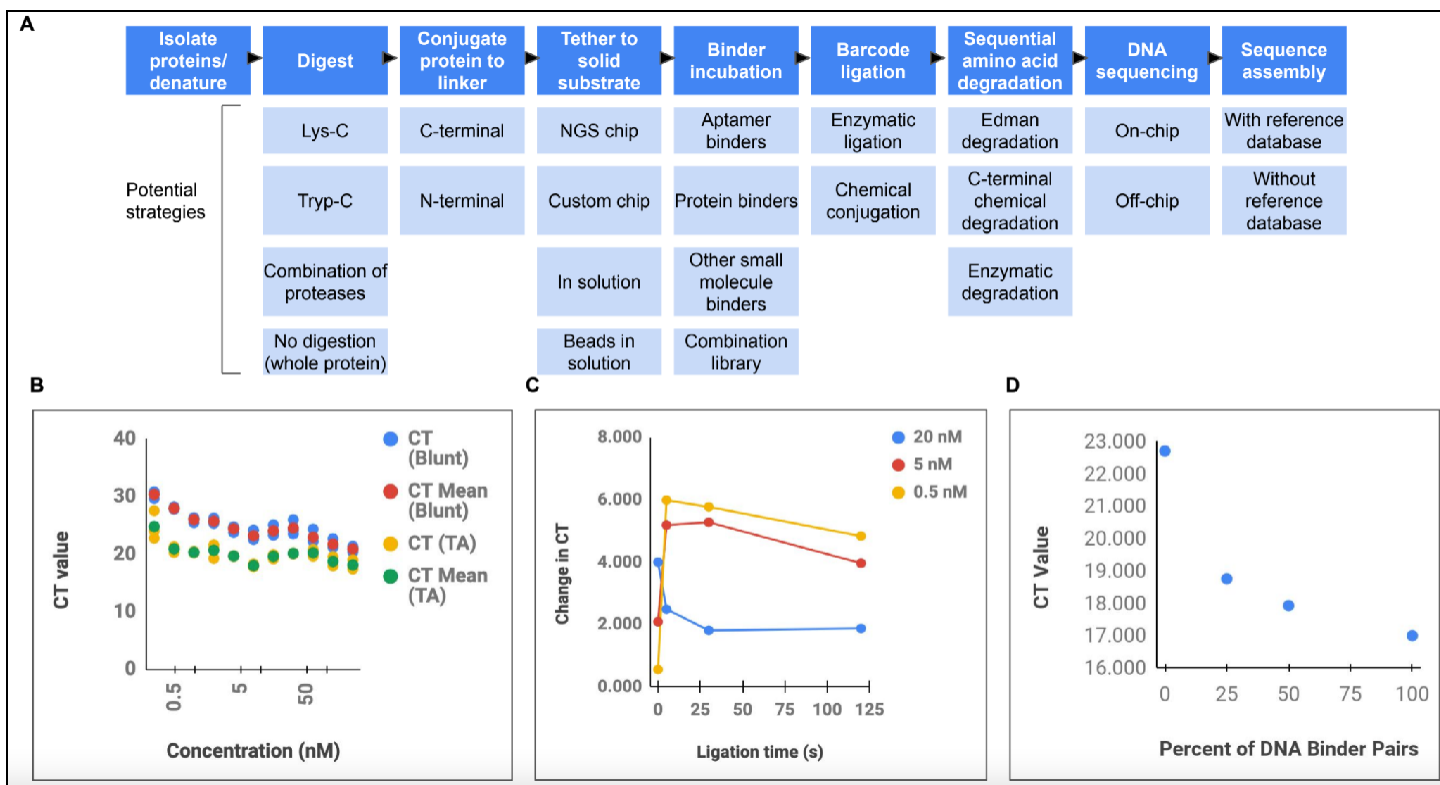

**Fig S8 Alternative Approaches for ProtSeq, Related to Figure 1**

- A) Alternative approaches by step (B-D) illustrates that ligation kinetics can be optimized to favor spatially-associated oligos in solution (oligos with TA overhang vs blunt-ended oligos). Refer to Table S14 for sequences.
- B) Effect of substrate concentration on qPCR threshold cycle number (CT) following ligation for blunt-ended dsDNA (red) and TA-overhang dsDNA (green). High CT values indicate lower DNA concentration. Ligation of blunt-ended oligonucleotides is weaker at lower DNA concentrations (slope of red) compared to oligonucleotides bound by a single TA overhang (slope of green).
- C) Delta CT at various time points for 0.5 nM and 5 nM, where delta CT represents the difference in CT values between ligated associated and ligated unassociated oligonucleotides. Highest preferential ligation between associated DNA-DNA pairs over unassociated pairs (CT = 6.0) occurred using 0.5 nM DNA concentration at 5 second timemark.
- D) CT decreases as the ratio of associated to unassociated pairs mixed together in solution decreases. Graph displays average CT, where each condition was performed in triplicate.



# Supplemental Tables

**Table S1. BCS Buffer Solutions, Related to Figure 1**

| Buffer                    | Formulation (5' - 3')                                                                                                                                                                                                                                             |
|---------------------------|-------------------------------------------------------------------------------------------------------------------------------------------------------------------------------------------------------------------------------------------------------------------|
| Hybridization Buffer      | 0.025% TWEEN20 in 1x PBS                                                                                                                                                                                                                                          |
| Blocking Buffer           | 0.025% TWEEN20 in 1x PBS + 10 mg/mL BSA                                                                                                                                                                                                                           |
| Chip Blocking Buffer      | 10 $\mu$ M of P5 Complementary oligo (5'-TCTCGGTGGTCGCCGTATCATT-3')/P7 Complementary oligo (5'-ATCTCGTATGCCGTCTTCTGCTTG-3') sequences + 10 $\mu$ M POC Tail blocking sequence (5'-TAGGGAAGAGAAGGACATATGATTATCCACGTGCATCTAAG-3' ) in 60 $\mu$ L of Blocking Buffer |
| Aptamer Incubation Buffer | 0.025% TWEEN20 in 1x PBS + 0.1mg/mL BSA                                                                                                                                                                                                                           |

**Table S2. Foundation Sequences And DNA Components Used In BCS Experiments, Related To Figure 2**

| Foundation Name         | Sequence                                                                                                                                                                    |
|-------------------------|-----------------------------------------------------------------------------------------------------------------------------------------------------------------------------|
| Fd7                     | /5Phos/CGACTGCGAGCTGATGGCCTTGATGATAACG                                                                                                                                      |
| Fd8                     | /5Phos/CGACTGCGAGCTGATGCGTACTAGGATAACG                                                                                                                                      |
| Fd11*                   | /5Phos/CGACTGCGAGCTGATGTGTACGCAGATAACG                                                                                                                                      |
| Fd12                    | /5Phos/CGACTGCGAGCTGATGCGTTTGCAGATAACG                                                                                                                                      |
| Fd13                    | /5Phos/CGACTGCGAGCTGATGTCTTTCCGGATAACG                                                                                                                                      |
| Fd14                    | /5Phos/CGACTGCGAGCTGATGTTGCTCACGATAACG                                                                                                                                      |
| Fd15                    | /5Phos/CGACTGCGAGCTGATGGAGTTACGGATAACG                                                                                                                                      |
| Fd16                    | /5Phos/CGACTGCGAGCTGATGTGATATAGGATAACG                                                                                                                                      |
| Fd17                    | /5Phos/CGACTGCGAGCTGATGACCTTAGAGATAACG                                                                                                                                      |
| Fd18                    | /5Phos/CGACTGCGAGCTGATGAGTTGCTTGATAACG                                                                                                                                      |
| Fd19                    | /5Phos/CGACTGCGAGCTGATGAGGTACCAGATAACG                                                                                                                                      |
| Fd20                    | /5Phos/CGACTGCGAGCTGATGCACTTACGGATAACG                                                                                                                                      |
| Fd21                    | /5Phos/CGACTGCGAGCTGATGTTGGGCAAGATAACG                                                                                                                                      |
| Fd22*                   | /5Phos/CGACTGCGAGCTGATGTTGGGCAAGATAACG                                                                                                                                      |
| Fd23                    | /5Phos/CGACTGCGAGCTGATGTTCCACGTGATAACG                                                                                                                                      |
| Fd24                    | /5Phos/CGACTGCGAGCTGATGAGGAGCAAGATAACG                                                                                                                                      |
| Fd25                    | /5Phos/CGACTGCGAGCTGATGTTCCCTTCGATAACG                                                                                                                                      |
| Fd26                    | /5Phos/CGACTGCGAGCTGATGTCTGAGGTGATAACG                                                                                                                                      |
| Fd27                    | /5Phos/CGACTGCGAGCTGATGTCATGTGGGATAACG                                                                                                                                      |
| Fd28                    | /5Phos/CGACTGCGAGCTGATGCACCAAACGATAACG                                                                                                                                      |
| Fd29                    | /5Phos/CGACTGCGAGCTGATGATTGTCCCGATAACG                                                                                                                                      |
| Fd31                    | /5Phos/CGACTGCGAGCTGATGTGGCATCTGATAACG                                                                                                                                      |
| Fd32*                   | /5Phos/CGACTGCGAGCTGATGCTTCTAGCGATAACG                                                                                                                                      |
| Fd43*                   | /5Phos/CGACTGCGAGCTGATGCAGCACATGATAACG                                                                                                                                      |
| Forward Cololinker (FC) | CATCAGCTCGCAGTCGATCTCGTATGCCGTCTTCTGTTTTTTTTTTTTTTTTTTTTTTTTTTTTTTTTTTTTTTTTTTTCCAGCCACCGCCAACCATCC                                                                         |
| Reverse Cololinker (RC) | ATTATCCACGTGCATCTAAGATCTCGTATGCCGTCTTCTGTTTTTTTTTTTTTTTTTTTTTTTTTTTTTTTTTTTTTTTTTTGGATGGTTGGCGGTGGCTGG                                                                      |
| Bridge                  | CTGCGCCTATAGGAATTCGTTATC/i5NitInd//i5NitInd//i5NitInd//i5NitInd//i5NitInd//i5NitInd//i5NitInd//i5NitInd//i5NitInd//i5NitInd//i5NitInd//i5NitInd//i5NitInd//GGACACGGCCGTTATC |

\*Four sequences which demonstrated greatest consistency in target deposition and rate of binder barcode capture

Fd=Foundation

i5NitInd=5-Nitroindole

**Table S3. DNA Cololinkers Used In Fluorescence Colocalization Experiment, Related To Figure 3**

| Name                    | Sequence (5' - 3')                                                                                                          |
|-------------------------|-----------------------------------------------------------------------------------------------------------------------------|
| Forward Cololinker (FC) | /Atto 488/<br>CATCAGCTCGCAGTCGATCTCGTATGCCGTCTTCTGTTTTTTTTTTTTTTTT<br>TTTTTTTTTTTTTTTTTTTTTTTTTTTTTTTTTCCAGCCACCGCCAACCATCC |
| Reverse Cololinker (RC) | /Atto 647/<br>ATTATCCACGTGCATCTAAGATCTCGTATGCCGTCTTCTGTTTTTTTTTTTT<br>TTTTTTTTTTTTTTTTTTTTTTTTTTTTTTTTTGGATGGTTGGCGGTGGCTGG |

**Table S4. DNA Binders and Targets Used in Single and Multiple Cycle DNA Binder-DNA Target Experiments, Related to Figures 4 and 5**

| Name               | Sequence                                                                             |
|--------------------|--------------------------------------------------------------------------------------|
| DNA Binder 4.1     | ATACATGGAATCCTAT                                                                     |
| DNA Binder 4.2     | ATACATGGAATCCTAT                                                                     |
| DNA Binder 6       | TCAGGTTAGTACTTCAT                                                                    |
| DNA Binder 9       | CTTGACTAGTACATGACCACTTGA                                                             |
| DNA Binder 10      | /5Phos/TCTTGGTAGATAACGAATTCGTATAGGCGCAGtttttATACATGGAATCCTAT                         |
| DNA Binder 11      | /5Phos/GATACTCAGATAACGAATTCGTATAGGCGCAGtttttTCAGGTTAGTACTTCAT                        |
| DNA Binder 12      | /5Phos/TGAACAGCGATAACGAATTCGTATAGGCGCAGtttttCTTGACTAGTACATGAC<br>CACTTGA             |
| DNA Binder 13      | /5Phos/GTTACGAAGATAACGAATTCGTATAGGCGCAGtttttTGCTGGTATGGCTTAA<br>TCC                  |
| Binder to Thrombin | /5Phos/GCCGTGTCCGCGTGTGGATCGATAACGAATTCCTATAGGCGCAGAGTCC<br>GTGGTAGGGCAGGTTGGGGTGACT |
| DNA Target 6       | /5Phos/cttagatgcacgtggataatTTTTTTTTTTTTTTTTTTTTTCAAGTGGTCATGTACTAGTCAAG              |
| DNA Target 9       | /5Phos/cttagatgcacgtggataatTTTTTTTTTTTTTTTTTTTTTATGAAGTACTAACCTGA                    |
| DNA Target 10      | /5Phos/cttagatgcacgtggataatTTTTTTTTTTTTTTTTTTTTTATAGGATTCC                           |
| DNA Target 11      | /5Phos/cttagatgcacgtggataatTTTTTTTTTTTTTTTTTTTTTATGAAGTACTAACCTGA                    |
| DNA Target 12      | /5Phos/cttagatgcacgtggataatTTTTTTTTTTTTTTTTTTTTTCAAGTGGTCATGTACTAGTCAAG              |
| DNA Target 13      | /5Phos/cttagatgcacgtggataatTTTTTTTTTTTTTTTTTTTTTGGATTTAAGCCATACCAGCA                 |

**Table S5. DNA target-DNA binder counts, Related to Figure 4**

| Target                     | 5Phos | 5Phos | 5Phos | 5Phos | Empty | DT 6  | DT 6  | DT 6  | DT 6  | DT 9  | DT 9  | DT 9  | DT 9 |
|----------------------------|-------|-------|-------|-------|-------|-------|-------|-------|-------|-------|-------|-------|------|
| Target Foundation          | Fd11  | Fd12  | Fd7   | Fd8   | Empty | Fd17  | Fd18  | Fd19  | Fd20  | Fd13  | Fd14  | Fd15  | Fd16 |
| DNA Binder 4.1 (Neg. Ctr ) | 0     | 0     | 0     | 0     | 0     | 0     | 0     | 0     | 1     | 0     | 1     | 0     | 1    |
| DNA Binder 4.2 (Neg. Ctr ) | 0     | 0     | 2     | 0     | 0     | 1     | 0     | 1     | 0     | 1     | 1     | 0     | 0    |
| DNA Binder 6               | 117   | 84    | 935   | 76    | 0     | 19140 | 11384 | 29377 | 18751 | 83    | 100   | 54    | 21   |
| DNA Binder 9               | 205   | 152   | 1768  | 191   | 0     | 277   | 135   | 375   | 252   | 28256 | 62962 | 11395 | 6234 |

DT=DNA Target

**Table S6. Sequencing Counts for DNA Target-DNA Binder 6 Cycle Experiment, Related to Figure 5**

| <b>Binder</b> | <b>Cycle</b> | <b>DNA Target 1</b> | <b>DNA Target 11</b> | <b>DNA Target 12</b> | <b>DNA Target 13</b> |
|---------------|--------------|---------------------|----------------------|----------------------|----------------------|
| DNA Binder 10 | 1            | 6539                | 2096                 | 1007                 | 885                  |
| DNA Binder 10 | 2            | 8835                | 116                  | 345                  | 107                  |
| DNA Binder 10 | 3            | 11316               | 155                  | 298                  | 179                  |
| DNA Binder 10 | 4            | 11440               | 317                  | 595                  | 242                  |
| DNA Binder 10 | 5            | 10406               | 235                  | 1218                 | 177                  |
| DNA Binder 10 | 6            | 5829                | 325                  | 1430                 | 257                  |
| DNA Binder 11 | 1            | 4885                | 16295                | 5540                 | 5520                 |
| DNA Binder 11 | 2            | 263                 | 12517                | 314                  | 113                  |
| DNA Binder 11 | 3            | 424                 | 16513                | 495                  | 189                  |
| DNA Binder 11 | 4            | 614                 | 13933                | 1219                 | 400                  |
| DNA Binder 11 | 5            | 1424                | 15798                | 3137                 | 839                  |
| DNA Binder 11 | 6            | 2211                | 14751                | 4209                 | 1333                 |
| DNA Binder 12 | 1            | 2982                | 2824                 | 17822                | 1786                 |
| DNA Binder 12 | 2            | 449                 | 217                  | 19332                | 178                  |
| DNA Binder 12 | 3            | 1554                | 1745                 | 5444                 | 1227                 |
| DNA Binder 12 | 4            | 1662                | 1265                 | 18408                | 1094                 |
| DNA Binder 12 | 5            | 2034                | 2167                 | 15733                | 1626                 |
| DNA Binder 12 | 6            | 1399                | 946                  | 12292                | 675                  |
| DNA Binder 13 | 1            | 6081                | 6385                 | 6884                 | 13344                |
| DNA Binder 13 | 2            | 157                 | 67                   | 275                  | 6867                 |
| DNA Binder 13 | 3            | 51                  | 11                   | 126                  | 702                  |
| DNA Binder 13 | 4            | 1616                | 1547                 | 2899                 | 12098                |
| DNA Binder 13 | 5            | 3173                | 3500                 | 5655                 | 14169                |
| DNA Binder 13 | 6            | 2835                | 2008                 | 4672                 | 6179                 |

**Table S7. Target Sequences and Foundations Used for Spot-Tag validation experiment, Related to Figure 6**

| Target Type                                                               | Target Name     | Sequence                                                                                                    | Foundations Used                      |
|---------------------------------------------------------------------------|-----------------|-------------------------------------------------------------------------------------------------------------|---------------------------------------|
| Spot-Tag*<br>(peptide target)                                             | Spot-Tag.O1     | (N-terminus)-PDRVRAVSHWSSGGG-Cys<br><br>(C-terminus)-3'ATCCCTTCTCTTCCTGTAT<br>ACTAATAGGTGCACGTAGATTC/5Phos/ | Fd31, Fd19, Fd20, Fd27,<br>Fd28, Fd29 |
| Bradykinin*<br>(peptide target<br>control for<br>non-specific<br>binding) | Brady.O1        | (N-terminus)-RPPGFSPFR-Cys<br><br>(C-terminus)-3'ATCCCTTCTCTTCCTGTAT<br>ACTAATAGGTGCACGTAGATTC/5Phos/       | Fd12, Fd13, Fd14                      |
| DNA**<br>(null control)                                                   | CLR.Null.Block  | CTTAGATGCACGTGGATAAT                                                                                        | Fd24, Fd25, Fd26                      |
| DNA**<br>(null control)                                                   | 5'Phos.O1       | /5Phos/CTTAGATGCACGTGGATA                                                                                   | Fd7, Fd8, Fd11                        |
| DNA** (positive<br>control)                                               | DNA Target 6.O1 | /5Phos/CTTAGATGCACGTGGATAATCATA<br>TGTCCTTCTCTTCCCTAATGAAGTACTAA<br>CCTGA                                   | Fd21, Fd22, Fd23                      |
| DNA** (positive<br>control)                                               | DNA Target 4.O1 | /5Phos/CTTAGATGCACGTGGATAATCATA<br>TGTCCTTCTCTTCCCTAATAGGATTCC                                              | Fd15, Fd16, Fd17                      |

\*The C-terminal of the peptide targets is directly conjugated to the 3' end of one DNA tail via a cysteine

\*\*Binding sequences and DNA tails of DNA targets are continuous oligos rather than conjugated through another chemical conjugation method.

**Table S8. Sequencing Counts for Spot-Tag Binder-Target Experiment, Related to Figure 7**

| Target       | Target Foundation | DNA Binder 4.2 | DNA Binder 6 | DNA Binder 9 (Neg. Ctr ) | Binder Spot-Tag |
|--------------|-------------------|----------------|--------------|--------------------------|-----------------|
| 5Phos        | Fd11              | 180            | 970          | 1                        | 288             |
| 5Phos        | Fd7               | 679            | 1269         | 4                        | 611             |
| 5Phos        | Fd8               | 91             | 523          | 0                        | 175             |
| Brady        | Fd12              | 24             | 116          | 0                        | 42              |
| Brady        | Fd13              | 516            | 1611         | 4                        | 1663            |
| Brady        | Fd14              | 222            | 1113         | 1                        | 603             |
| CLR          | Fd24              | 224            | 1061         | 2                        | 405             |
| CLR          | Fd25              | 233            | 930          | 3                        | 558             |
| CLR          | Fd26              | 81             | 361          | 0                        | 92              |
| Empty        | Empty             | 0              | 0            | 0                        | 0               |
| DNA Target 4 | Fd15              | 7201           | 397          | 0                        | 207             |
| DNA Target 4 | Fd16              | 8399           | 447          | 2                        | 107             |
| DNA Target 4 | Fd17              | 11355          | 441          | 1                        | 188             |
| DNA Target 6 | Fd21              | 83             | 28641        | 3                        | 129             |
| DNA Target 6 | Fd22              | 82             | 28871        | 1                        | 148             |
| DNA Target 6 | Fd23              | 50             | 21007        | 0                        | 96              |
| Spot-Tag     | Fd19              | 132            | 485          | 2                        | 7013            |
| Spot-Tag     | Fd20              | 138            | 406          | 0                        | 9825            |
| Spot-Tag     | Fd27              | 114            | 453          | 38                       | 3461            |
| Spot-Tag     | Fd28              | 124            | 455          | 1                        | 4976            |
| Spot-Tag     | Fd29              | 161            | 458          | 1                        | 10803           |
| Spot-Tag     | Fd31              | 130            | 428          | 1                        | 5256            |

**Table S9. Thrombin Binder Sequencing Counts**

| Target                   | 5Phos | 5Phos | 5Phos | CLR  | CLR  | CLR  | DT4       | DT4   | DT4   | Thrombin | Thrombin | Thrombin |
|--------------------------|-------|-------|-------|------|------|------|-----------|-------|-------|----------|----------|----------|
| Target Foundation        | Fd11  | Fd7   | Fd8   | Fd12 | Fd13 | Fd14 | Fd15      | Fd16  | Fd17  | Fd22     | Fd27     | Fd31     |
| DNA Binder 4.2           | 1412  | 2082  | 856   | 369  | 1797 | 1947 | 4793<br>6 | 52275 | 48420 | 2239     | 1724     | 1747     |
| DNA Binder 9 (Neg. Ctr ) | 25    | 70    | 25    | 10   | 70   | 44   | 8         | 14    | 24    | 148      | 1470     | 72       |
| Binder to Thrombin       | 73    | 99    | 30    | 13   | 132  | 132  | 36        | 70    | 40    | 2203     | 1500     | 1487     |

DT=DNA Target

**Table S10. Dipeptide switch design of A-D groups and backbones (+, - : hydrophobicity), Related to Figure 8**

| i              |    |    |    |    |    | Backbone (A-D) |
|----------------|----|----|----|----|----|----------------|
| <i>A group</i> | A+ | W0 | D- | C+ | R- | ADRWADRK       |
| <i>B group</i> | L+ | P- | S0 | Q- | M+ | MSQPLQPK       |
| <i>C group</i> | I+ | F+ | E- | N- | H- | NHFENEIK       |
| <i>D group</i> | V+ | Y- | G0 | T0 | K- | TKYVGTGK       |



**Table S11. SELEX Aptamer, Peptide Target, and NGS Sequences, Related to Figures 8 and 9**

| Name                                                                          | Sequence                                                                              |
|-------------------------------------------------------------------------------|---------------------------------------------------------------------------------------|
| Aptamer Screening Library<br>(Forward Primer FP - N40 -<br>Reverse Primer RP) | TTGACTAGTACATGACCACTTGA-N40-TTCTGTCGTCCAGTCTGATGT<br>G                                |
| SELEX Peptide PP-C                                                            | PPNHFENEIK bt                                                                         |
| SELEX Peptide PP-D                                                            | PPTKYVGTGK bt                                                                         |
| SELEX Peptide Bradykinin                                                      | RPPGFSPFRK bt                                                                         |
| NGS Forward Sequencing<br>Primer*                                             | AATGATACGGCGACCACCGAGATCTACAC- <b>XXXXXX</b> -GCATGCAGCC<br>GGTTGACTAGTACATGACCACTTGA |
| NGS Reverse Sequencing<br>Primer*                                             | CAAGCAGAAGACGGCATAACGAGAT- <b>XXXXXXXX</b> -GTGCGTGCGTGCT<br>TCTGTCGTCCAGTCTGATGTG    |
| NGS N40 Library<br>preparation Forward Primer                                 | 5'-CAAGCAGAAGACGGCATAACGAGATNNNNNNNN-(Forward<br>primer)-3'                           |
| NGS N40 Library<br>preparation Reverse<br>Reverse                             | 5'-AATGATACGGCGACCACCGAGATCTACACNNNNNN-(Reverse<br>primer)-3'                         |
| Aptamer 1                                                                     | FP - GACGGTACAGCTTAGTGAATTGCCCCCGACGCAGGGGTT - RP                                     |
| Aptamer 2                                                                     | FP - TTTGCCGCTGTCTGACGCAAGACCACATCAACTTTATTTTC - RP                                   |
| Aptamer 3                                                                     | FP - CGCTCGTGTTGCTCGATCAAGGGTCTGTGCGTCTAGCTGG - RP                                    |
| Aptamer 4                                                                     | FP - ACACCCAGACACCGCTGTCCGACGCAGGACTGACTGGGGC - RP                                    |
| Aptamer 5                                                                     | FP - AACGACCGGTTAGACTGTGACCGCTTATCGCCGCAGATAT - RP                                    |
| Aptamer 6                                                                     | FP - CGCATCCGGCGCAGGATTCAAGCGGGATTGTAAGGTAAGA - RP                                    |
| Aptamer 7                                                                     | FP - GACATTGCCCTTCGCCGCAGAAGTGATGAAAGGGTTTGTG - RP                                    |
| Aptamer 8                                                                     | FP - CGCTCGTGTTGCTCGATCAAGTGGACTAGAATTTGCTTCT - RP                                    |
| Aptamer 9                                                                     | FP - CCACGGAATAATGATGGTGGTTGCTCCCCGACGCAGGGGC - RP                                    |
| Aptamer 10                                                                    | FP - ACGCACCGATCGCAGGTTACGTGGTATAACACTTTGTAA - RP                                     |

\*Unique barcodes for each individual barcode listed in Table S12.

bt = biotinylated

NGS = Next Generation Sequencing

**Table S12. Individual NGS Barcodes (XXXXXX) from Table S11, Related to Figures 8 and 9**

| Forward Primer | Barcode | Reverse Primer   | Barcode  |
|----------------|---------|------------------|----------|
| Fw1 NGS        | ATCACG  | Rv1 NGS          | TCGCCTTA |
| Fw2 NGS        | TAAGGC  | Rv2 NGS          | CTAGTACG |
| Fw3 NGS        | ACATGT  | Rv3 NGS          | TTCTGCCT |
| Fw4 NGS        | GATCAG  | OMB63<br>Rv4 NGS | GCTCAGGA |
| Fw5 NGS        | CGATCT  | Rv5 NGS          | AGGAGTCC |
| Fw6 NGS        | TTAGGC  | Rv6 NGS          | CATGCCTA |
| Fw7 NGS        | GCGAAC  | Rv7 NGS          | GTAGAGAG |
| Fw8 NGS        | GTGCCT  | Rv8 NGS          | CCTCTCTG |
| Fw9 NGS        | AACTCT  | Rv9 NGS          | AGCGTAGC |
| Fw10 NGS       | TTGAGA  | Rv10 NGS         | CAGCCTCG |
|                |         | Rv11 NGS         | TGCCTCTT |
|                |         | Rv12 NGS         | TCCTCTAC |

**Table S13. Target-Switch SELEX Stringencies by Round and Target Type, Related to Figure 8**

| Round | "Non-Switch" Stringency | "Switch" Stringency | "Switch" Backbone |
|-------|-------------------------|---------------------|-------------------|
| 1     | 1:1                     | 1:1                 | C                 |
| 2     | 1:2                     | 1:1                 | D                 |
| 3     | 1:5                     | 1:2                 | C                 |
| 4     | 1:10                    | 1:2                 | D                 |
| 5     | 1:25                    | 1:5                 | C                 |

Targets following the "non-switch" stringency gradient include the negative control, enrichment reference, specificity filter, and PP-C. The only target following the "switch" stringency gradient is the PP-CD switch target.

**Table S14. DNA and Peptide Sequences for Alternative Ligation Methods, Related to Figure 1 and Figure S8**

| Name                   | Sequence (5' to 3', N-terminus to C-terminus)                                                |
|------------------------|----------------------------------------------------------------------------------------------|
| 50A                    | AACATGACTTTACAACCCAAGAGCTTTGTAGGGAAGAGAAGGACATATGATACG<br>AATTCtcggtcgcagatcctacgaaGCCAATggT |
| 50A partial complement | /5Phos/CCATTGGCTTCGTAGGATCTGCGACCGAGAATTCGTATCATATGTCCTT<br>CTCTTCCCTA                       |
| 50B                    | CAAAGCTCTTGGGTTGTAAAGTCATGTTTCAAGTGGTCATGTACTAGTCAAacg<br>GCCAATcA                           |
| 50B partial complement | /5Phos/GATTGGCCGTTTGACTAGTACATGACCACTTGA                                                     |
| 0A                     | TAGGGAAGAGAAGGACATATGATACAAGCTTtcggtcgcagatcctacgaaCAGATCggT                                 |
| 0A partial complement  | /5Phos/CCGATCTGTTCGTAGGATCTGCGACCGAAAGCTTGTATCATATGTCCTT<br>CTCTTCCCTA                       |
| 0B                     | TCAAGTGGTCATGTACTAGTCAAacgCAGATCcA                                                           |
| 0B partial complement  | /5Phos/GGATCTGCGTTTGACTAGTACATGACCACTTGA                                                     |
| Trilink forward        | TAGGGAAGAGAAGGACATATGAT                                                                      |
| Trilink reverse        | TCAAGTGGTCATGTACTAGTCAA                                                                      |
| NC1                    | KQNTSQNTSC                                                                                   |
| NC2                    | KQNTYQNTSC                                                                                   |
